# Supplementary material for: Persistent 7-tesla phase rim predicts poor outcome in new multiple sclerosis patient lesions
Source: JCI journal article supplement (doi:10.1172/jci86198), 2016-06-05
Supplement: sd2 [file 2]

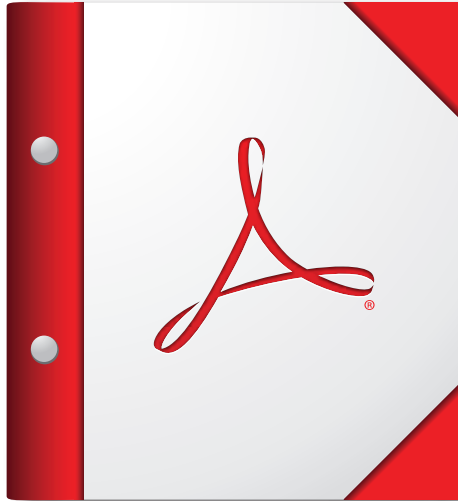

**For the best experience, open this PDF portfolio in  
Acrobat X or Adobe Reader X, or later.**

[Get Adobe Reader Now!](#)
